# Supplementary material for: In situ polymerization of graphene-polyaniline@polyimide composite films with high EMI shielding and electrical properties
Source: Royal Society of Chemistry journal article supplement (doi:10.1039/c9ra08026k), 2020-01-01
Supplement: c9ra08026k1.pdf [file c9ra08026k1.pdf]

Electronic Supplementary Material (ESI) for RSC Advances.

This journal is © The Royal Society of Chemistry 2019

## Supporting Information

### In situ polymerization of graphene-polyaniline@ polyimide nanocomposite films with high EMI shielding and electrical properties

Kui Cheng,<sup>†</sup> Haoliang Li,<sup>†\*</sup> Mohan Zhu, Hanxun Qiu and Junhe Yang<sup>\*</sup>

School of Material Science and Engineering, University of Shanghai for Science and Technology, Shanghai 200093, China

Kui Cheng, Haoliang Li, contributed equally to this work

Corresponding authors: lih11989@outlook.com jhyang@usst.edu.cn

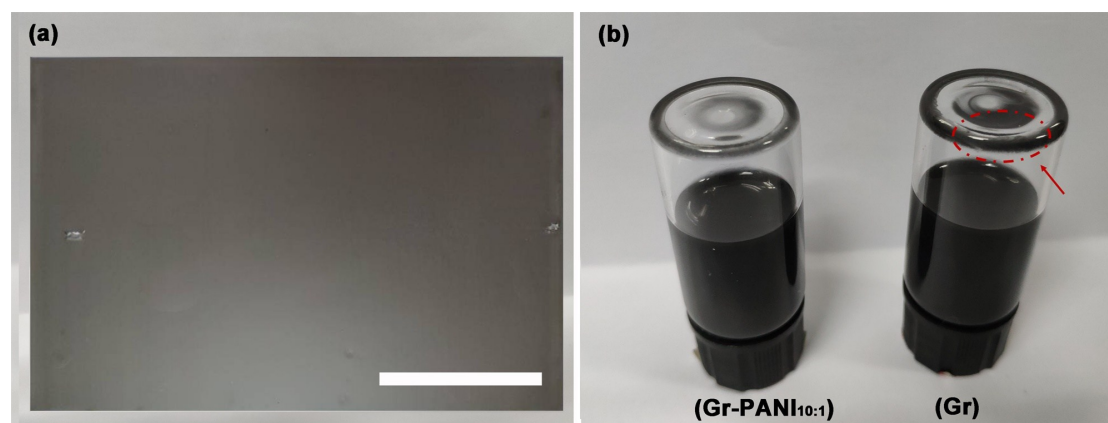

Fig. S1 (a) The large size 40%Gr-PANI<sub>10:1</sub>@PI film (the scale bar is 10 cm); (b) Gr-PANI<sub>10:1</sub> in NMP and Gr in NMP.

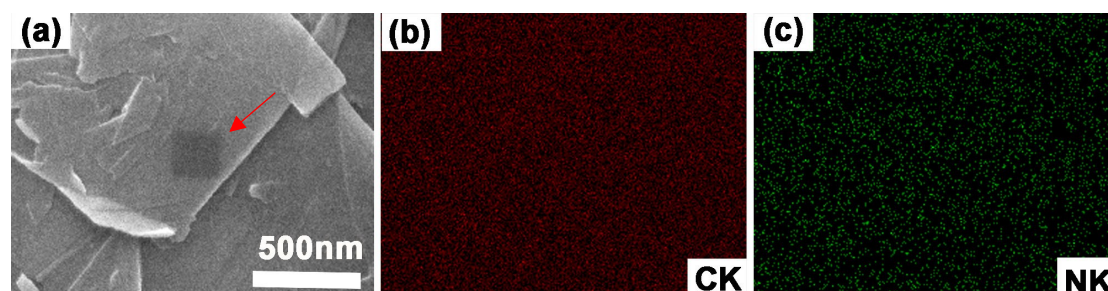

Fig. S2. SEM image of Gr-PANI<sub>10:1</sub> and the EDS mapping of Gr-PANI<sub>10:1</sub>.

Table S1 Element content of Gr-PANI<sub>10:1</sub> composites.

| Element (Gr-PANI <sub>10:1</sub> ) | At%   |
|------------------------------------|-------|
| CK                                 | 77.15 |
| NK                                 | 22.19 |
| OK                                 | 00.66 |

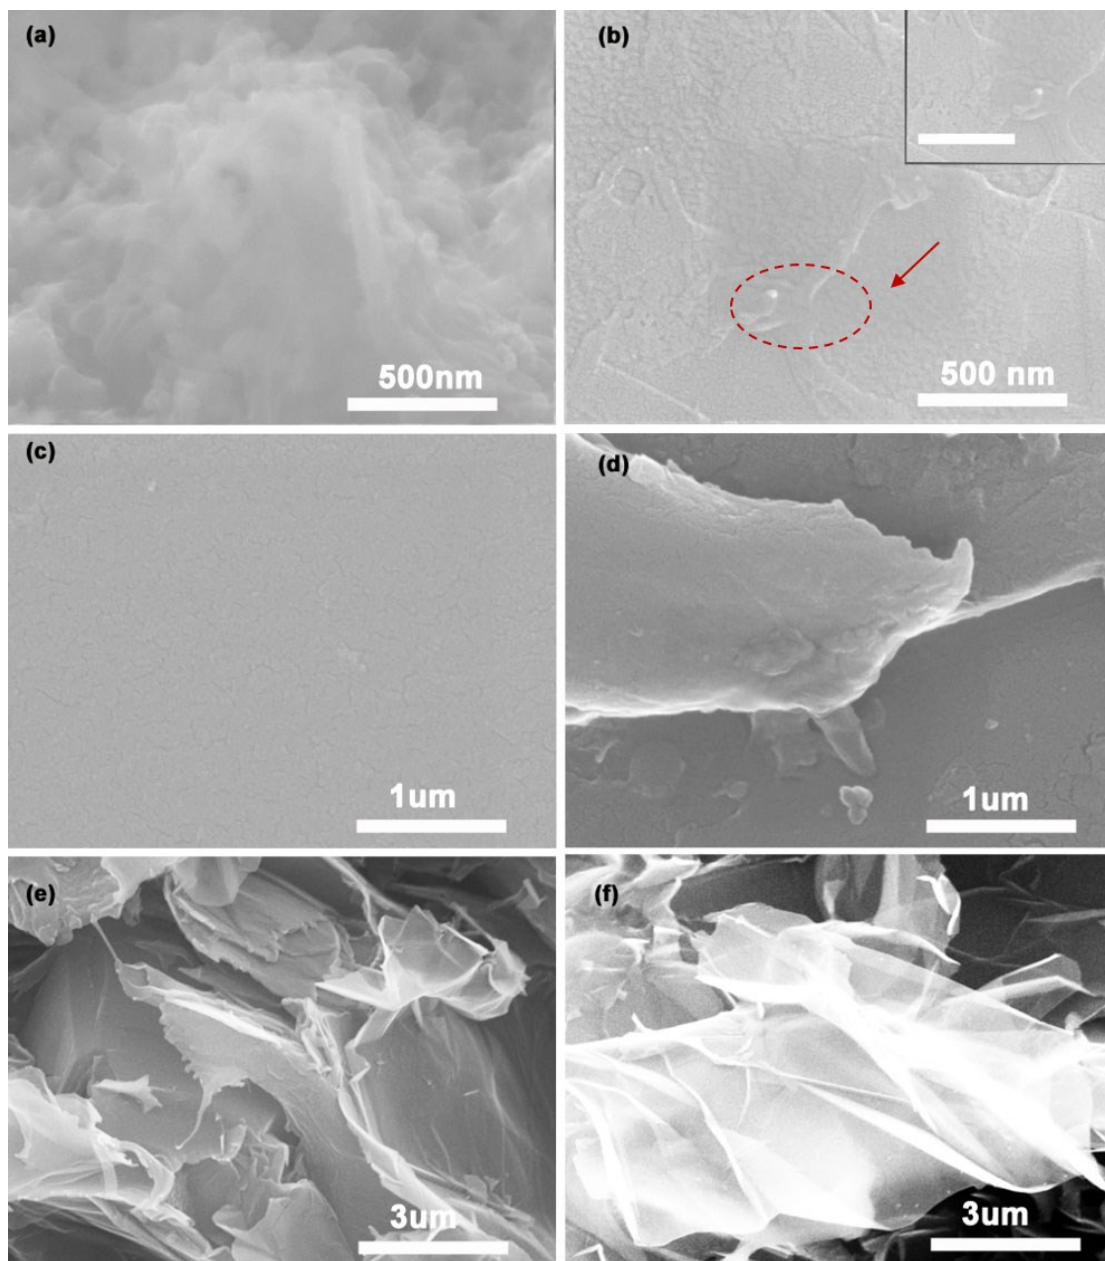

Fig. S3 The SEM images of (a, b,c,d) surface morphology of PANI, Gr-PANI<sub>5:1</sub>, Gr-PANI<sub>10:1</sub>@PI and PI; The cross-section images (e, f) of Gr@PI and Gr-PANI<sub>10:1</sub>@PI; The inset shows the magnification of the selected area and the scale bar is 0.1 um.

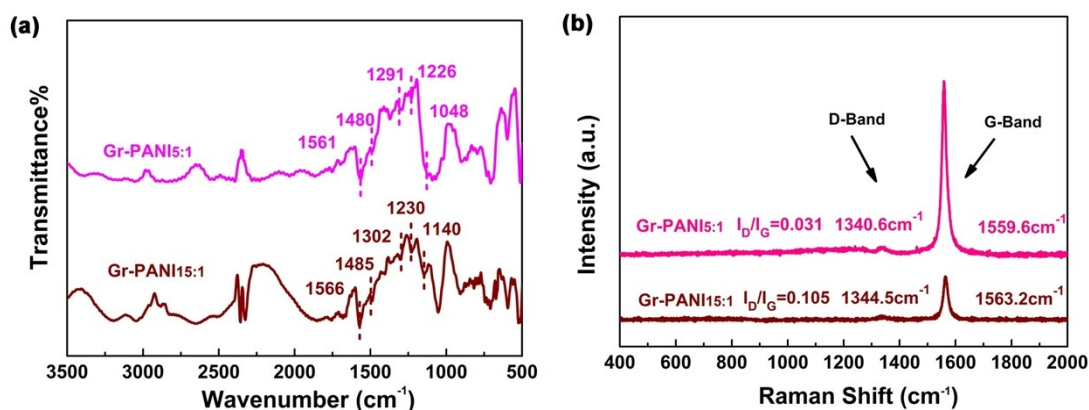

Fig. S4 (a) FTIR spectra of Gr-PANI<sub>5:1</sub> and Gr-PANI<sub>15:1</sub> composites; (b) Raman spectra of Gr-PANI<sub>5:1</sub> and Gr-PANI<sub>15:1</sub> composites.

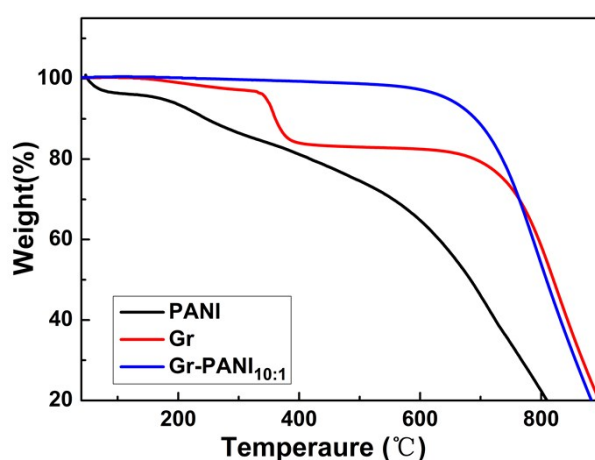

Fig. S5 TGA curves of pure PANI, Gr and Gr-PANI<sub>10:1</sub> composites.

Fig. S5 shows TGA curves of pure PANI, Gr and Gr-PANI<sub>10:1</sub> composites. The 15 wt% weight loss temperatures of the PANI, Gr and Gr-PANI<sub>10:1</sub> are 328.5 °C, 383.1 °C, and 717.5°C, respectively. Meanwhile, the residual weight at 700 °C for the Gr-PANI<sub>10:1</sub> is remarkably enhanced from 79.3% (pure Gr) to 86.8%, indicating that the Gr-PANI<sub>10:1</sub> shows superior thermal stability. The TGA curve of Gr-PANI<sub>10:1</sub> is the superposition of Gr and PANI. The weight ratio of PANI in Gr-PANI<sub>10:1</sub> is calculated by the following equation (1):

$$\text{wt\%(PANI)} = 1 - \frac{\Delta W_2 - \Delta W_3}{\Delta W_2 - \Delta W_1} \times 100\% \quad (1)$$

where the  $\Delta W_1$ ,  $\Delta W_2$  and  $\Delta W_3$  represent the weight loss of Gr-PANI<sub>10:1</sub>, PANI and Gr from 40 to 800 °C. According to the TGA data, the PANI content in Gr-PANI<sub>10:1</sub> is 12.5 wt%, which is close to the theoretical value.

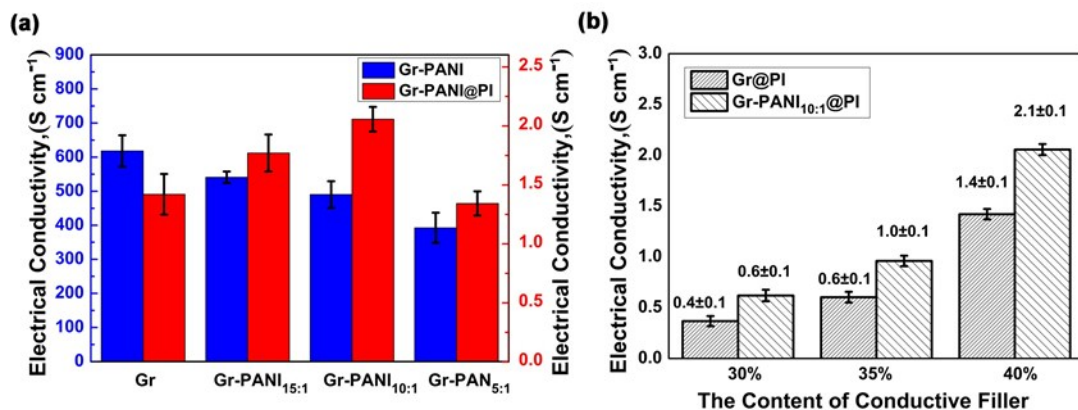

Fig. S6 Electrical conductivity of (a) Gr-PANI and 40%Gr-PANI@PI with different mass ratios of Gr to PANI; (b) Gr@PI and Gr-PANI<sub>10:1</sub>@PI with different filler contents.

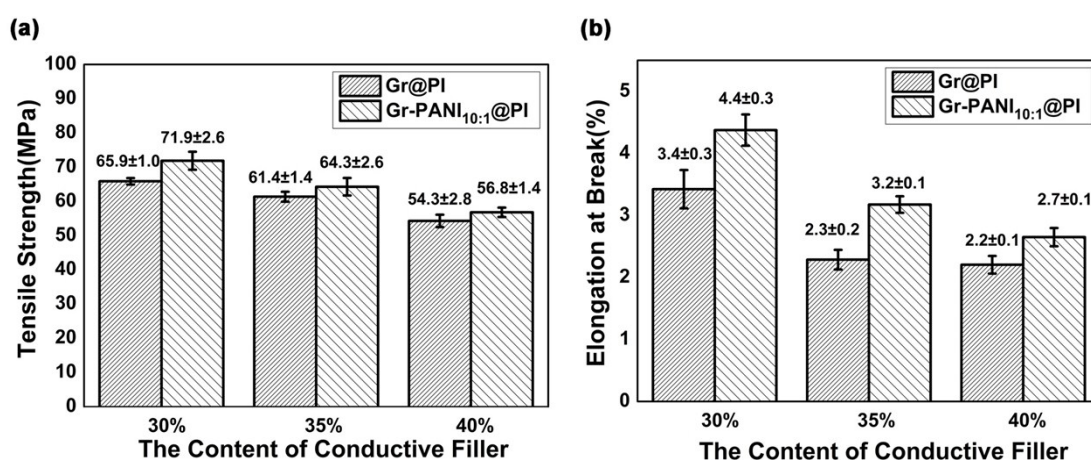

Fig. S7 The mechanical properties of Gr@PI and Gr-PANI<sub>10:1</sub>@PI with different filler contents (a) the tensile strength; (b) the elongation at break.

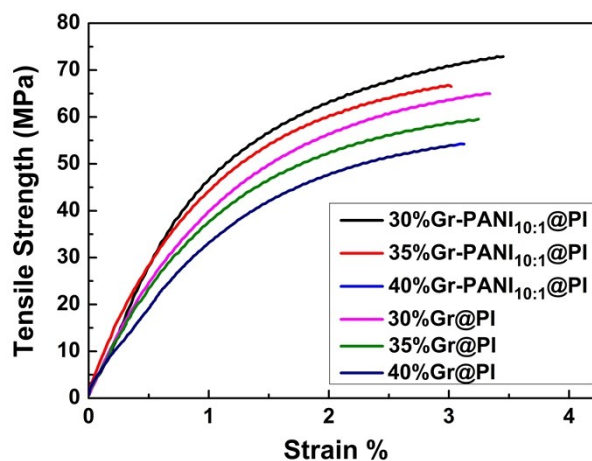

Fig. S8 Typical stress-strain curves of pure Gr@PI and Gr-PANI<sub>10:1</sub>@PI films with different filler contents.

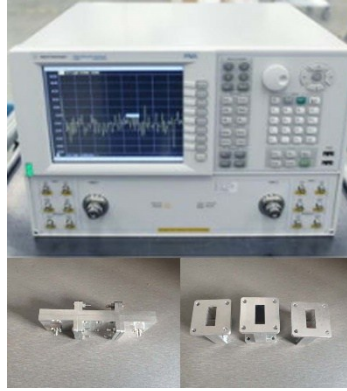

Fig. S9 Experiment setup for EMI shielding measurement: vector network analyzer.

Table S2 EMI shielding performance of various carbon-based polymer composite films

| Materials                   | Content (wt%) | Thickness (mm) | EMI SE <sub>T</sub> (dB) | EMI SSE value (dB·cm <sup>2</sup> g <sup>-1</sup> ) | Ref       |
|-----------------------------|---------------|----------------|--------------------------|-----------------------------------------------------|-----------|
| PS/graphene                 | 30.0          | 2.50           | ~17.3                    | ~256.3                                              | 1         |
| PEI/graphene foam           | 10.0          | 2.30           | ~11.0                    | ~164.9                                              | 2         |
| PU/MWCNT                    | 22.0          | 0.10           | ~20.0                    | /                                                   | 3         |
| WPU/CNT                     | 76.2          | 0.32           | ~49.0                    | ~3408.0                                             | 4         |
| PVDF/graphene               | 15.0          | 0.10           | /                        | ~1265.0                                             | 5         |
| Phenolic/rGO                | 70.0          | 0.30           | ~43.4                    | /                                                   | 6         |
| PI/graphene                 | 8.0           | 0.50           | 13.7–14.9                | ~693.0                                              | 7         |
| PI/graphene foam            | 16.0          | 0.80           | 17.0-21.0                | ~75.0                                               | 8         |
| PE/graphene                 | 15.0          | 1.00           | ~33.0                    | /                                                   | 9         |
| Cellulose/CNT               | 40.0          | 0.15           | ~35.0                    | ~1372.4                                             | 10        |
| WPU/CNT                     | 76.2          | 2.30           | ~35.0                    | ~2143.0                                             | 11        |
| Gr-PANI <sub>10:1</sub> @PI | 40.0          | 0.04           | ~21.3                    | ~4096.2                                             | This work |

## References

- 1 D. X. Yan, P. G. Ren, H. Pang, Q. Fu, M. B. Yang and Z. M. Li, *J. Mater. Chem.*, 2012, **22**, 18772-18774.
- 2 J. Ling, W. Zhai, W. Feng, B. Shen and G. Z. Wen, *ACS Appl. Mater. Interfaces.*, 2013, **5**, 2677-2684.
- 3 A. S. Hoang, *Adv. Nat. Sci-Nano.*, 2011, **2**, 5766–5771.
- 4 Z. Zeng, M. Chen, J. Hao, W. Li, X. Xiao, L. Zhou, Y. Pei, Z. Hui and Z. Zhong, *Carbon.*, 2016, **96**, 768-777.
- 5 H. B. Zhang, Q. Yan, W. G. Zheng, Z. He and Z. Z. Yu, *ACS Appl. Mater. Interfaces.*, 2011, **3**, 918-924.
- 6 A. P. Singh, P. Garg, F. Alam, K. Singh, R. B. Mathur, R. P. Tandon, A. Chandra and S. K. Dhawan, *Carbon.*, 2012, **50**, 3868-3875.
- 7 H. Yang, Z. Li, H. Zou and P. Liu, *Polym. Adv. Technol.*, 2016, **28**(2), 233-242.
- 8 Y. Li, X. Pei, B. Shen, W. Zhai, L. Zhang and W. Zheng, *RSC Adv.*, 2015, **5**(31), 24342-24351.
- 9 M. H. Al-Saleh, *J. Phys. D-Appl. Phys.*, 2016, **49**(19), 195302.
- 10 L.-Q. Zhang, B. Yang, J. Teng, J. Lei, D.-X. Yan, G.-J. Zhong and Z.-M. Li, *J. Mater. Chem. C.*, 2017, **5**, 3130-3138.
- 11 Z. Zeng, H. Jin, M. Chen, W. Li, L. Zhou and Z. Zhang, *Adv. Funct. Mater.*, 2016, **26**, 303-310.
